# Supplementary material for: Probiogenomic In-Silico Analysis and Safety Assessment of Lactiplantibacillus plantarum DJF10 Strain Isolated from Korean Raw Milk
Source: MDPI journal article supplement (doi:10.3390/ijms232214494), 2022-11-21
Supplement: s1 [file s1]

**Table S5.** The protein- BLAST results for the members in the Plantaricin gene cluster of *Lactiplantibacillus plantarum* DJF10 predicted with BAGEL4 webserver

| #  | Name                              | Gene start<br>(bp) | Gene<br>end (bp) | Gene<br>strand | Function                                                                                                                                | E-value | Percent<br>identity | Accession      |
|----|-----------------------------------|--------------------|------------------|----------------|-----------------------------------------------------------------------------------------------------------------------------------------|---------|---------------------|----------------|
| 1  | orf00001 (LanT)                   | 554                | 2704             | -              | Bacteriocin ABC-transporter, ATP-binding and permease protein PlnG [ <i>Lactiplantibacillus plantarum</i> ]                             | 0       | 99.9%               | MCG0835499.1   |
| 2  | orf00003<br>(170.2;Plantaricin_E) | 2971               | 3141             | +              | two-peptide bacteriocin plantaricin EF subunit PlnE [ <i>Lactiplantibacillus</i> ]                                                      | 5E-31   | 100%                | WP_003641985.1 |
| 3  | orf00005<br>(171.2;Plantaricin_F) | 3166               | 3324             | +              | two-peptide bacteriocin plantaricin EF subunit PlnF [ <i>Lactiplantibacillus</i> ]                                                      | 5E-29   | 100%                | WP_003643811.1 |
| 4  | orf00010 (PlnI)                   | 3405               | 4196             | +              | CPBP family glutamic-type intramembrane protease [ <i>Lactiplantibacillus paraplantarum</i> ]                                           | 4E-151  | 99.24%              | WP_251898977.1 |
| 5  | orf00012                          | 4502               | 5245             | -              | response regulator PlnD [ <i>Lactiplantibacillus plantarum</i> ]                                                                        | 3E-178  | 99.19%              | ADE08254.1     |
| 6  | orf00013                          | 5364               | 6032             | -              | response regulator PlnC, activator [ <i>Lactiplantibacillus plantarum</i> ]                                                             | 2E-149  | 99.55%              | MCG0835494.1   |
| 7  | orf00014                          | 6108               | 7436             | -              | histidine protein kinase [ <i>Lactiplantibacillus plantarum</i> ]                                                                       | 0       | 99.55%              | ACO06046.1     |
| 8  | orf00016 (167.2;Plantaricin_A)    | 7627               | 7782             | -              | hypothetical protein FC76_GL001049 [ <i>Lactiplantibacillus plantarum</i> subsp. <i>plantarum</i> ATCC 14917 = JCM 1149 = CGMCC 1.2437] | 1E-16   | 100%                | KRL33425.1     |
| 9  | orf00017                          | 8109               | 8282             | -              | plantaricin biosynthesis protein PlnQ [ <i>Lactiplantibacillus plantarum</i> ]                                                          | 3E-31   | 98.25%              | ABD15220.1     |
| 10 | orf00020 (PlnP)                   | 8651               | 9397             | -              | CPBP family intramembrane metalloprotease [ <i>Lactiplantibacillus plantarum</i> ]                                                      | 1E-132  | 98.79%              | WP_047672663.1 |
| 11 | orf00021 (GlyS)                   | 9428               | 10627            | -              | glycosyltransferase family 2 protein [ <i>Lactiplantibacillus plantarum</i> ]                                                           | 0       | 99.75%              | WP_063204020.1 |
| 12 | orf00022 (174.2;Plantaricin_N)    | 10745              | 10912            | -              | bacteriocin [ <i>Lactiplantibacillus</i> ]                                                                                              | 2E-29   | 100%                | WP_003641975.1 |
| 13 | orf00023                          | 11040              | 11240            | -              | Immunity protein PlnM [ <i>Lactiplantibacillus plantarum</i> ]                                                                          | 1E-19   | 93.18%              | KEZ15850.1     |
| 14 | orf00027<br>(172.2;Plantaricin_J) | 12102              | 12269            | +              | two-peptide bacteriocin plantaricin JK subunit PlnJ [ <i>Lactiplantibacillus plantarum</i> ]                                            | 7E-31   | 98.18%              | WP_015379769.1 |
| 15 | orf00028 (173.2;Plantaricin_K)    | 12300              | 12473            | +              | two-peptide bacteriocin plantaricin JK subunit PlnK [ <i>Lactiplantibacillus plantarum</i> ]                                            | 8E-20   | 98.25%              | WP_196500391.1 |
| 16 | orf00029 (PlnL)                   | 12470              | 13138            | +              | bacteriocin immunity protein [ <i>Lactiplantibacillus plantarum</i> ]                                                                   | 2E-137  | 99.55%              | WP_072540368.1 |
| 17 | orf00031                          | 13163              | 13315            | +              | plantaricin biosynthesis protein PlnR [ <i>Lactiplantibacillus plantarum</i> ]                                                          | 1E-25   | 100 %               | AAS21880.1     |
| 18 | orf00032                          | 13550              | 13753            | -              | hypothetical protein [ <i>Lactiplantibacillus plantarum</i> ]                                                                           | 3E-41   | 98.51%              | WP_107787099.1 |
| 19 | orf00034                          | 14138              | 15334            | -              | putative Na(+)/H(+) antiporter [ <i>Lactiplantibacillus plantarum</i> subsp. <i>plantarum</i> ]                                         | 0       | 100%                | AFM80194.1     |
| 20 | orf00037                          | 15367              | 16776            | -              | branched-chain amino acid transport system II carrier protein [ <i>Lactiplantibacillus plantarum</i> subsp. <i>plantarum</i> ]          | 0       | 100%                | EFK30741.1     |
| 21 | orf00039                          | 17269              | 18084            | -              | Cof-type HAD-IIB family hydrolase [ <i>Lactiplantibacillus plantarum</i> ]                                                              | 0       | 99.61%              | WP_162045214.1 |
| 22 | orf00041                          | 18208              | 19116            | +              | AraC family transcriptional regulator [ <i>Lactiplantibacillus</i> ]                                                                    | 0       | 99.66%              | APP12939.1     |

|    |          |       |       |   |                                                                              |        |        |                |
|----|----------|-------|-------|---|------------------------------------------------------------------------------|--------|--------|----------------|
|    |          |       |       |   | <i>plantarum</i> subsp. <i>plantarum</i> ]                                   |        |        |                |
| 23 | orf00043 | 19187 | 19978 | + | Cof-type HAD-IIB family hydrolase [ <i>Lactiplantibacillus plantarum</i> ]   | 3E-166 | 100%   | WP_072540366.1 |
| 24 | orf00046 | 19982 | 21136 | + | MFS transporter [ <i>Lactiplantibacillus plantarum</i> ]                     | 0      | 99.74% | WP_063204022.1 |
| 25 | orf00047 | 21140 | 21757 | + | sugar O-acetyltransferase [ <i>Lactiplantibacillus plantarum</i> ]           | 3E-138 | 99.51% | WP_133279594.1 |
| 26 | orf00048 | 21763 | 21900 | - | hypothetical protein I526_0335 [ <i>Lactiplantibacillus plantarum</i> DOMLa] | 3E-23  | 97.78% | AHN68020.1     |
| 27 | orf00052 | 22139 | 22417 | - | hypothetical protein [ <i>Lactiplantibacillus plantarum</i> ]                | 6E-54  | 100%   | WP_072540096.1 |
