# Supplementary material for: Probiogenomic In-Silico Analysis and Safety Assessment of Lactiplantibacillus plantarum DJF10 Strain Isolated from Korean Raw Milk
Source: MDPI journal article supplement (doi:10.3390/ijms232214494), 2022-11-21
Supplement: s1 [file s1]

**Table S4.** The aminoacid sequences of the predicted bacteriocin and properties of the mature peptide sequences

| Bacteriocin   | Aminoacid sequence*                                      | Length of the mature product (aminoacids) | pI of mature product | MW of the mature product (Da) |
|---------------|----------------------------------------------------------|-------------------------------------------|----------------------|-------------------------------|
| Plantaricin E | MLQFEKLQYSRLPQKKLAKISGGFNRGGYNFGKSVRHVVDAIGSVAGIRGILKSIR | 33                                        | 11.57                | 3545.11                       |
| Plantaricin F | MKKFLVLRDRELNAISGGVFHAYSARGVRNNYKSAVGPADWVISAVRGFIHG     | 34                                        | 10.27                | 3703.18                       |
| Plantaricin A | VIIMKIQIKGMKQLSNKEMQKIVGGKSSAYSLOMGATAIKOVKKLFKKWGW      | 26                                        | 10.4                 | 2985.58                       |
| Plantaricin N | MKSLDKIAGLGIEMAEEKDLTTVEGGKNYSKTWWYKSLTLLGKVAEGTSSAWHGLG | 30                                        | 9.7                  | 3369.83                       |
| Plantaricin J | MTVNKMIKDLVDVDAFAPISNNKLNQVVGGAWKNEFWSSLRKGFYDGEAGRAIRR  | 25                                        | 10.93                | 2872.24                       |
| Plantaricin K | MKIKLTVLNEFEELTADAENKISGGRSRKNGIGYAIGYAFGAVERAVLGGSRDYNK | 32                                        | 10.52                | 3502.94                       |

\* The mature peptides without GG leader sequences underlined
